# Supplementary material
Source: MDPI journal article supplement (https://www.mdpi.com/2673-6004/4/1/12)
Supplement: s1 [file s1]

**Table S1: Manganese concentrations in feathers and other data collected from Tufted Titmice caught at two distances from metal processing plants.**

| Bird ID | Site of collection <sup>1</sup> | Body mass (g) | BMI (g/mm) | Mass of breast feather (g) | Mass of tail feather (g) | Manganese concentration (ug/L) in tail feather |
|---------|---------------------------------|---------------|------------|----------------------------|--------------------------|------------------------------------------------|
| 1       | Latrobe                         | 23            | 0.69       | 0.0007                     | 0.0106                   | 7.94                                           |
| 2       | Latrobe                         | 21            | 0.69       | 0.0012                     | 0.0095                   | 3.54                                           |
| 3       | Latrobe                         | 20.25         | 0.64       | 0.0007                     | 0.0112                   | 3.20                                           |
| 4       | Latrobe                         | 22            | 0.7        | 0.0007                     | 0.0113                   | 1.93                                           |
| 5       | Latrobe                         | 22            | 0.67       | 0.0016                     | 0.0101                   | 3.30                                           |
| 6       | Latrobe                         | 19.5          | 0.63       | 0.0011                     | 0.0089                   | 5.69                                           |
| 7       | Latrobe                         | 22            | 0.7        | 0.0007                     | 0.0118                   | 2.86                                           |
| 8       | Latrobe                         | 20.5          | 0.65       | 0.0007                     | 0.0103                   | 3.27                                           |
| 9       | Bridgeville                     | 20            | 0.64       | 0.0004                     | 0.0096                   | 9.26                                           |
| 10      | Bridgeville                     | 22            | 0.69       | 0.0004                     | 0.0121                   | 13.52                                          |
| 11      | Bridgeville                     | 18.5          | 0.6        | 0.0003                     | 0.0088                   | 4.39                                           |
| 12      | Bridgeville                     | 19            | 0.61       | 0.0007                     | 0.0086                   | 15.35                                          |
| 13      | Bridgeville                     | 21            | 0.67       | 0.0006                     | 0.0108                   | 10.45                                          |
| 14      | Bridgeville                     | 20            | 0.64       | 0.0004                     | 0.0101                   | 6.78                                           |
| 15      | Bridgeville                     | 21.5          | 0.67       | 0.0006                     | 0.0104                   | 10.89                                          |
| 16      | Bridgeville                     | 20.5          | 0.66       | 0.0007                     | 0.0092                   | 12.54                                          |

<sup>1</sup> The Latrobe site was approximately 4 km from a metal processing plant. The Bridgeville site was approximately 0.3 km from a different metal processing plant.
